# Supplementary material
Source: ML conference proceedings conference paper supplement (https://openreview.net/forum?id=YxgXwd9lxM)

SEA Concept Drift - Drift Recovery Performance

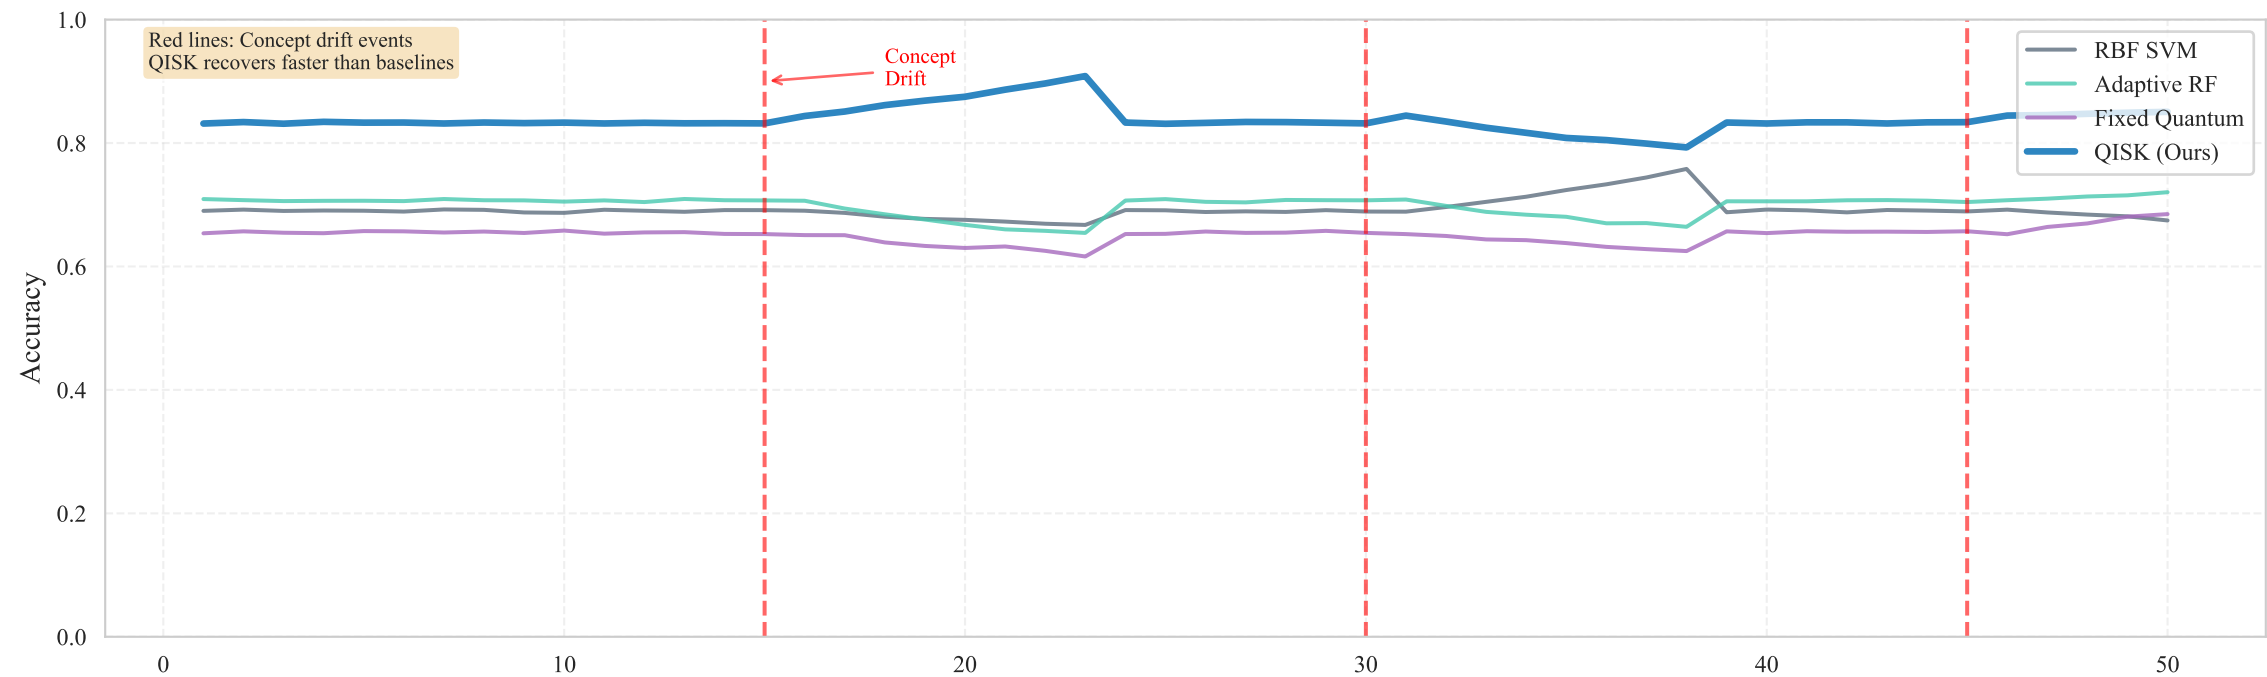

Rotating Hyperplane - Drift Recovery Performance

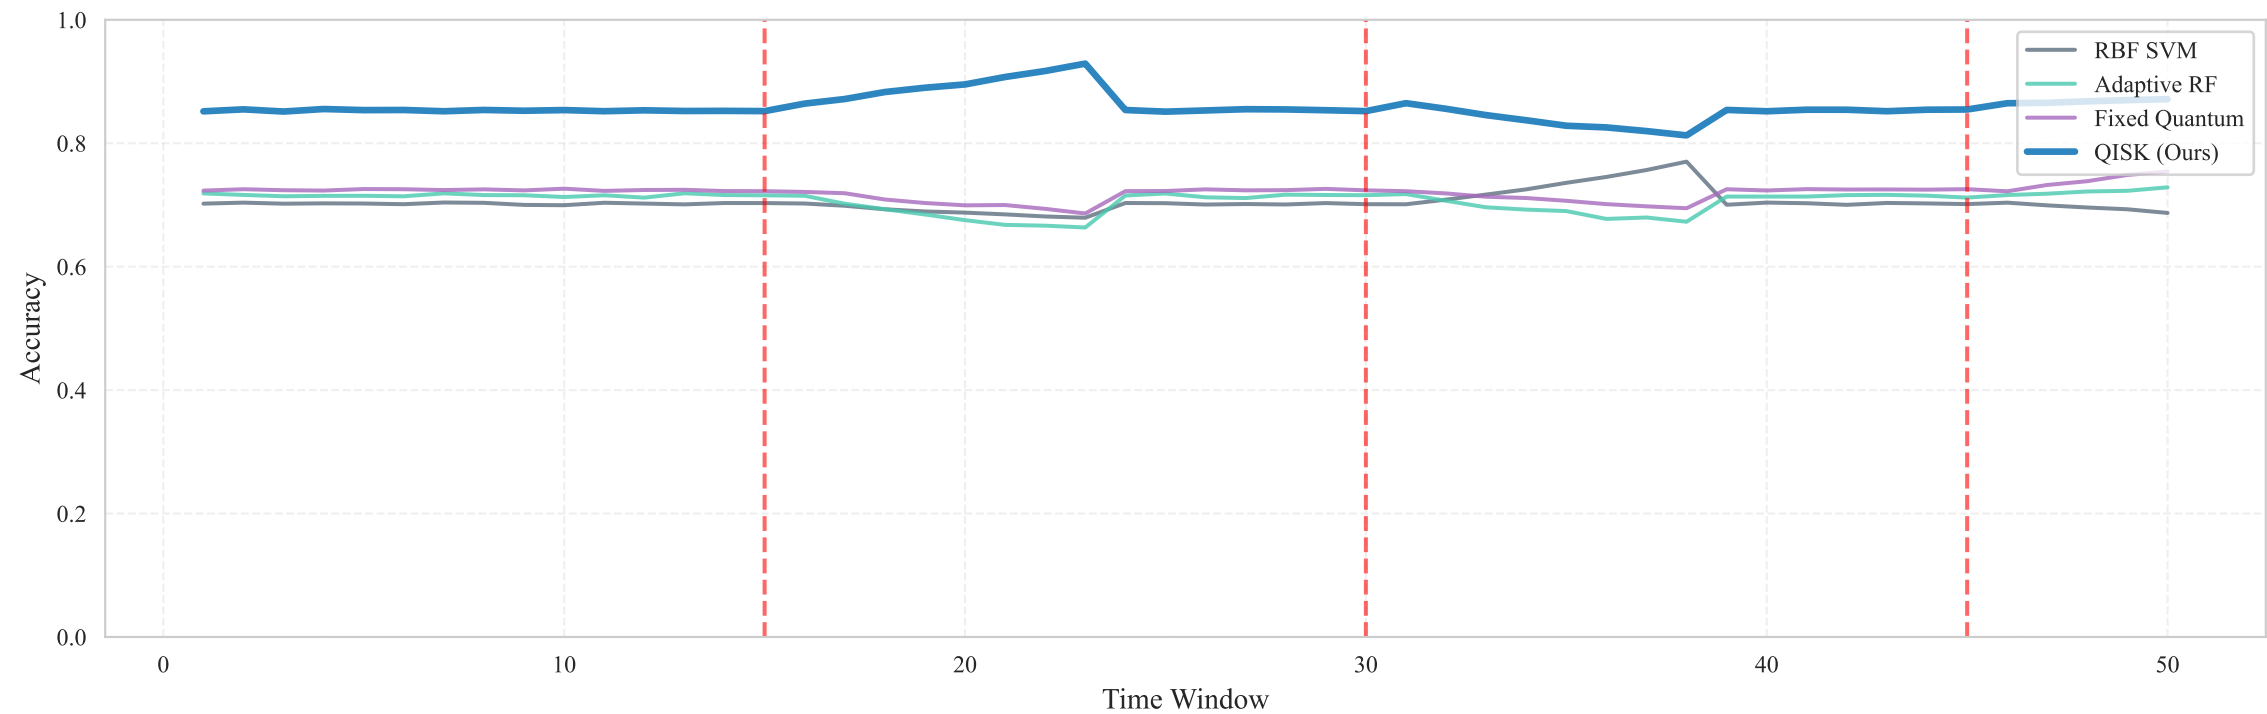

Supplement: supplementary_material [file window_performance_timeseries.pdf › paper/window_performance_timeseries.pdf]
