# Supplementary material
Source: ML conference proceedings conference paper supplement (https://openreview.net/forum?id=YxgXwd9lxM)

SEA Concept Drift

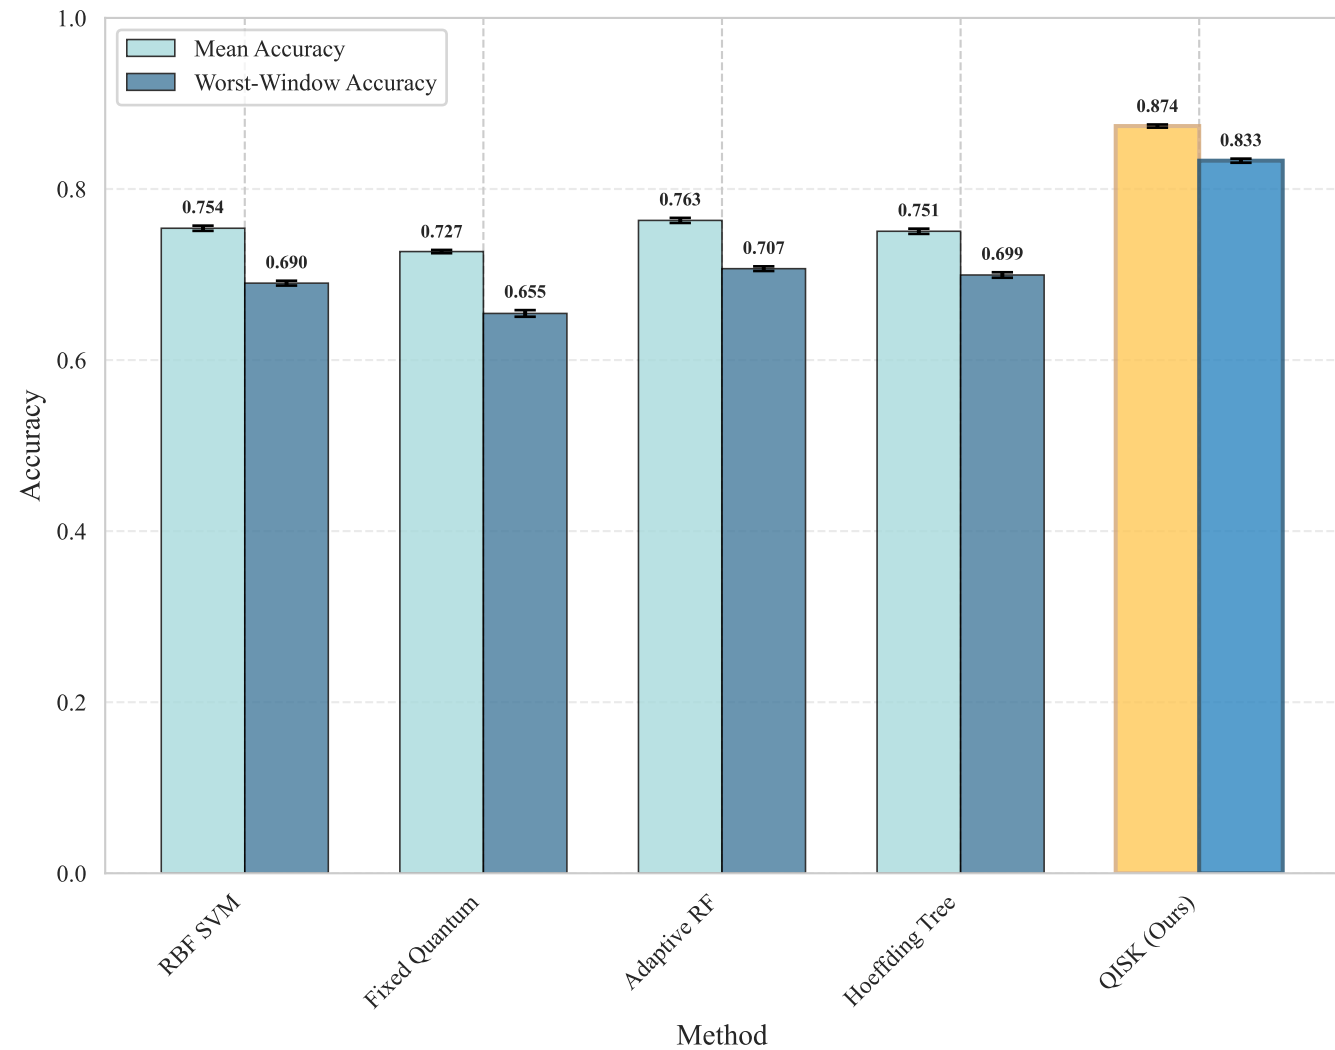

Rotating Hyperplane

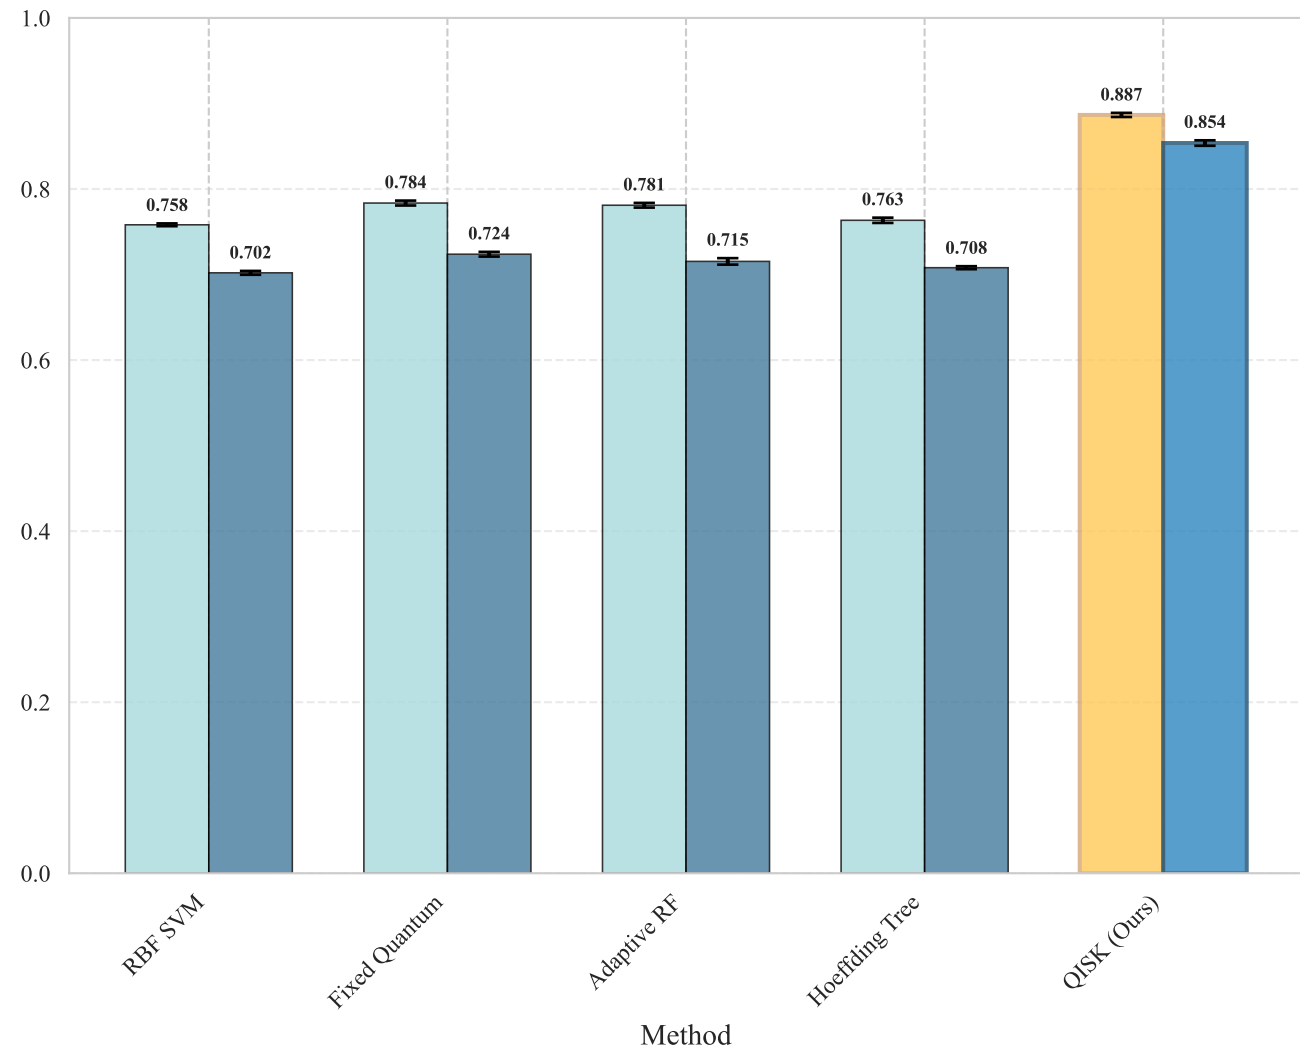

Supplement: supplementary_material [file performance_comparison.pdf › paper/performance_comparison.pdf]
